# Supplementary material for: Effects of efpeglenatide versus liraglutide on gastric emptying, glucose metabolism and beta-cell function in people with type 2 diabetes: an exploratory, randomized phase Ib study
Source: PubMed Central journal article supplement — BMJ Open Diabetes Res Care. 2021 Jun 25;9(1):e002208. doi: 10.1136/bmjdrc-2021-002208 (PMC8237726; doi:10.1136/bmjdrc-2021-002208), 2021-06-25
Supplement: bmjdrc-2021-002208supp001.pdf [file bmjdrc-2021-002208supp001.pdf]

Supplementary Material

Supplementary Figure S1 Study design

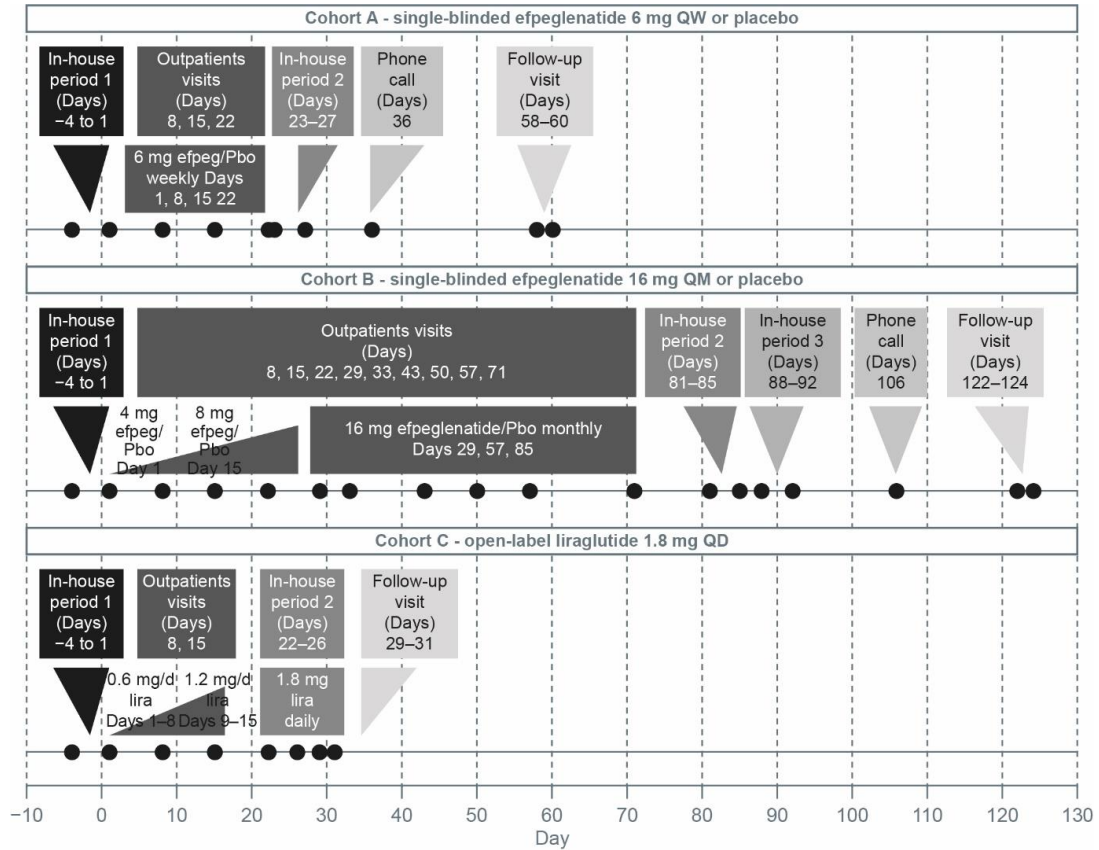

Pbo placebo, QD once daily, QM once monthly, QW once weekly.

## Supplementary Figure S2 Flow diagram

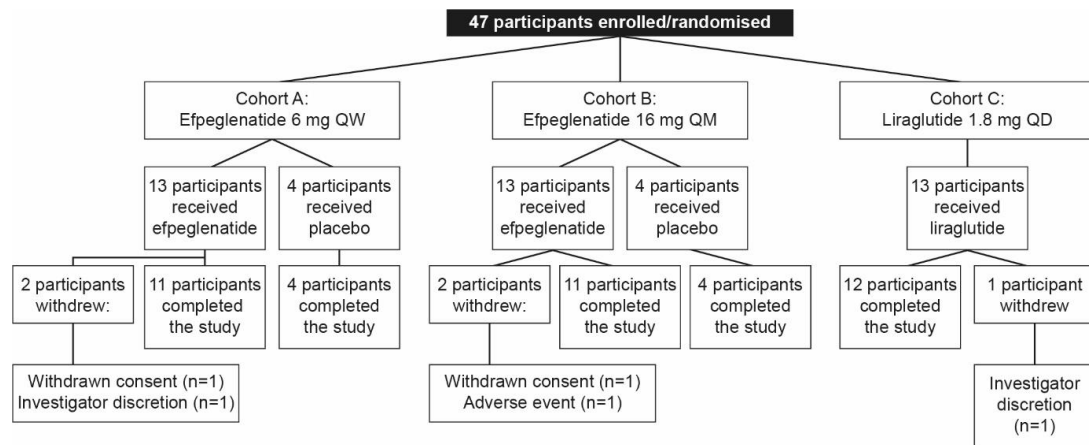

**Supplementary Table S1** PK parameters at peak concentration of efpeglenatide – following a Mixed Meal tolerance test (MMT)

|                                        |                                       | <b>Comparison</b>              | <b>LS mean<br/>ratio<sup>‡</sup></b> | <b>90% CI<br/>Lower</b> | <b>90% CI<br/>Upper</b> | <b>Nominal<br/>P-value<sup>§</sup></b> |
|----------------------------------------|---------------------------------------|--------------------------------|--------------------------------------|-------------------------|-------------------------|----------------------------------------|
| <b>Acetaminophen PK<br/>parameters</b> | Efpeglenatide 6 mg QW vs liraglutide  | AUC <sub>0-60</sub> (h*µg/mL)  | 1.236                                | 0.703                   | 2.171                   | 0.2652                                 |
|                                        |                                       | AUC <sub>0-120</sub> (h*µg/mL) | 1.275                                | 0.918                   | 1.770                   | 0.1105                                 |
|                                        |                                       | AUC <sub>0-180</sub> (h*µg/mL) | 1.330                                | 0.972                   | 1.820                   | 0.0668                                 |
|                                        |                                       | AUC <sub>0-360</sub> (h*µg/mL) | 1.175                                | 0.839                   | 1.644                   | 0.2122                                 |
|                                        |                                       | C <sub>max</sub> (µg/mL)       | 1.206                                | 0.927                   | 1.569                   | 0.1187                                 |
|                                        | Efpeglenatide 16 mg QM vs liraglutide | AUC <sub>0-60</sub> (h*µg/mL)  | 1.260                                | 0.715                   | 2.221                   | 0.2477                                 |
|                                        |                                       | AUC <sub>0-120</sub> (h*µg/mL) | 1.077                                | 0.781                   | 1.485                   | 0.3495                                 |
|                                        |                                       | AUC <sub>0-180</sub> (h*µg/mL) | 1.031                                | 0.764                   | 1.393                   | 0.4318                                 |
|                                        |                                       | AUC <sub>0-360</sub> (h*µg/mL) | 0.855                                | 0.619                   | 1.181                   | 0.2097                                 |
|                                        |                                       | C <sub>max</sub> (µg/mL)       | 0.988                                | 0.769                   | 1.270                   | 0.4690                                 |
| Efpeglenatide 6 mg QW vs placebo       | AUC <sub>0-60</sub> (h*µg/mL)         | 0.459                          | 0.247                                | 0.853                   | 0.0408                  |                                        |
|                                        | AUC <sub>0-120</sub> (h*µg/mL)        | 0.676                          | 0.473                                | 0.965                   | 0.0713                  |                                        |
|                                        | AUC <sub>0-180</sub> (h*µg/mL)        | 0.769                          | 0.550                                | 1.076                   | 0.1957                  |                                        |

|                                    |                                      |                                |       |       |       |        |
|------------------------------------|--------------------------------------|--------------------------------|-------|-------|-------|--------|
|                                    |                                      | AUC <sub>0-360</sub> (h*µg/mL) | 0.899 | 0.627 | 1.290 | 0.6214 |
|                                    |                                      | C <sub>max</sub> (µg/mL)       | 0.794 | 0.598 | 1.054 | 0.1775 |
|                                    | Efpeglenatide 16 mg QM vs placebo    | AUC <sub>0-60</sub> (h*µg/mL)  | 0.468 | 0.249 | 0.880 | 0.0496 |
|                                    |                                      | AUC <sub>0-120</sub> (h*µg/mL) | 0.571 | 0.400 | 0.816 | 0.0118 |
|                                    |                                      | AUC <sub>0-180</sub> (h*µg/mL) | 0.596 | 0.426 | 0.834 | 0.0133 |
|                                    |                                      | AUC <sub>0-360</sub> (h*µg/mL) | 0.655 | 0.456 | 0.940 | 0.0557 |
|                                    |                                      | C <sub>max</sub> (µg/mL)       | 0.651 | 0.492 | 0.860 | 0.0133 |
|                                    | Liraglutide vs placebo               | AUC <sub>0-60</sub> (h*µg/mL)  | 0.372 | 0.199 | 0.692 | 0.0108 |
|                                    |                                      | AUC <sub>0-120</sub> (h*µg/mL) | 0.530 | 0.373 | 0.754 | 0.0043 |
|                                    |                                      | AUC <sub>0-180</sub> (h*µg/mL) | 0.578 | 0.416 | 0.805 | 0.0081 |
|                                    |                                      | AUC <sub>0-360</sub> (h*µg/mL) | 0.765 | 0.536 | 1.092 | 0.2118 |
|                                    |                                      | C <sub>max</sub> (µg/mL)       | 0.658 | 0.500 | 0.866 | 0.0144 |
| <b>Postprandial plasma glucose</b> | Efpeglenatide 6 mg QW vs liraglutide | AUC <sub>0-60</sub> (h*mg/dL)  |       |       |       |        |
|                                    |                                      |                                | 0.938 | 0.831 | 1.059 | 0.1891 |
|                                    |                                      | AUC <sub>0-120</sub> (h*mg/dL) | 0.919 | 0.816 | 1.035 | 0.1198 |
|                                    |                                      | AUC <sub>0-180</sub> (h*mg/dL) | 0.908 | 0.811 | 1.017 | 0.0799 |
|                                    |                                      | AUC <sub>0-360</sub> (h*mg/dL) | 0.891 | 0.802 | 0.991 | 0.0377 |

|                 |                                       |                                |       |       |       |         |
|-----------------|---------------------------------------|--------------------------------|-------|-------|-------|---------|
|                 |                                       | C <sub>max</sub> (mg/dL)       | 0.929 | 0.814 | 1.059 | 0.1745  |
|                 | Efpeglenatide 16 mg QM vs liraglutide | AUC <sub>0-60</sub> (h*mg/dL)  | 0.930 | 0.820 | 1.054 | 0.1679  |
|                 |                                       | AUC <sub>0-120</sub> (h*mg/dL) | 0.928 | 0.821 | 1.049 | 0.1565  |
|                 |                                       | AUC <sub>0-180</sub> (h*mg/dL) | 0.926 | 0.824 | 1.039 | 0.1333  |
|                 |                                       | AUC <sub>0-360</sub> (h*mg/dL) | 0.906 | 0.813 | 1.010 | 0.0663  |
|                 |                                       | C <sub>max</sub> (mg/dL)       | 0.922 | 0.806 | 1.054 | 0.1566  |
|                 | Efpeglenatide 6 mg QW vs placebo      | AUC <sub>0-60</sub> (h*mg/dL)  | 0.628 | 0.548 | 0.720 | <0.0001 |
|                 |                                       | AUC <sub>0-120</sub> (h*mg/dL) | 0.617 | 0.539 | 0.706 | <0.0001 |
|                 |                                       | AUC <sub>0-180</sub> (h*mg/dL) | 0.607 | 0.533 | 0.690 | <0.0001 |
|                 |                                       | AUC <sub>0-360</sub> (h*mg/dL) | 0.647 | 0.573 | 0.731 | <0.0001 |
|                 |                                       | C <sub>max</sub> (mg/dL)       | 0.644 | 0.555 | 0.747 | <0.0001 |
|                 | Efpeglenatide 16 mg QM vs placebo     | AUC <sub>0-60</sub> (h*mg/dL)  | 0.623 | 0.543 | 0.715 | <0.0001 |
|                 |                                       | AUC <sub>0-120</sub> (h*mg/dL) | 0.623 | 0.544 | 0.713 | <0.0001 |
|                 |                                       | AUC <sub>0-180</sub> (h*mg/dL) | 0.618 | 0.543 | 0.703 | <0.0001 |
|                 |                                       | AUC <sub>0-360</sub> (h*mg/dL) | 0.657 | 0.582 | 0.743 | <0.0001 |
|                 |                                       | C <sub>max</sub> (mg/dL)       | 0.639 | 0.550 | 0.741 | <0.0001 |
| <b>Glucagon</b> | Efpeglenatide 6 mg QW vs liraglutide  | AUC <sub>0-60</sub> (h*pmol/L) | 0.834 | 0.648 | 1.074 | 0.1169  |

|                                       |                                 |       |       |       |        |
|---------------------------------------|---------------------------------|-------|-------|-------|--------|
|                                       | AUC <sub>0-120</sub> (h*pmol/L) | 0.870 | 0.661 | 1.144 | 0.1980 |
|                                       | AUC <sub>0-180</sub> (h*pmol/L) | 0.878 | 0.677 | 1.140 | 0.2031 |
|                                       | AUC <sub>0-360</sub> (h*pmol/L) | 0.877 | 0.679 | 1.132 | 0.1959 |
|                                       | C <sub>max</sub> (pmol/L)       | 0.950 | 0.716 | 1.261 | 0.3804 |
| Efpeglenatide 16 mg QM vs liraglutide | AUC <sub>0-60</sub> (h*pmol/L)  | 0.720 | 0.561 | 0.925 | 0.0165 |
|                                       | AUC <sub>0-120</sub> (h*pmol/L) | 0.700 | 0.533 | 0.920 | 0.0169 |
|                                       | AUC <sub>0-180</sub> (h*pmol/L) | 0.701 | 0.541 | 0.908 | 0.0130 |
|                                       | AUC <sub>0-360</sub> (h*pmol/L) | 0.662 | 0.514 | 0.852 | 0.0044 |
|                                       | C <sub>max</sub> (pmol/L)       | 0.747 | 0.562 | 0.993 | 0.0463 |
| Efpeglenatide 6 mg QW vs placebo      | AUC <sub>0-60</sub> (h*pmol/L)  | 0.688 | 0.523 | 0.903 | 0.0262 |
|                                       | AUC <sub>0-120</sub> (h*pmol/L) | 0.685 | 0.509 | 0.920 | 0.0371 |
|                                       | AUC <sub>0-180</sub> (h*pmol/L) | 0.680 | 0.514 | 0.900 | 0.0256 |
|                                       | AUC <sub>0-360</sub> (h*pmol/L) | 0.720 | 0.549 | 0.945 | 0.0491 |
|                                       | C <sub>max</sub> (pmol/L)       | 0.792 | 0.581 | 1.079 | 0.2119 |
| Efpeglenatide 16 mg QM vs placebo     | AUC <sub>0-60</sub> (h*pmol/L)  | 0.594 | 0.449 | 0.785 | 0.0032 |
|                                       | AUC <sub>0-120</sub> (h*pmol/L) | 0.551 | 0.407 | 0.747 | 0.0021 |
|                                       | AUC <sub>0-180</sub> (h*pmol/L) | 0.543 | 0.407 | 0.724 | 0.0010 |

|                               |                                       |                                 |       |       |       |         |
|-------------------------------|---------------------------------------|---------------------------------|-------|-------|-------|---------|
|                               |                                       | AUC <sub>0-360</sub> (h*pmol/L) | 0.544 | 0.412 | 0.718 | 0.0007  |
|                               |                                       | C <sub>max</sub> (pmol/L)       | 0.623 | 0.455 | 0.854 | 0.0156  |
| <b>Fasting plasma glucose</b> | Efpeglenatide 6 mg QW vs liraglutide  | C <sub>max</sub> (mg/dL)        | 0.957 | 0.840 | 1.090 | 0.2865  |
|                               | Efpeglenatide 16 mg QM vs liraglutide | C <sub>max</sub> (mg/dL)        | 0.875 | 0.765 | 0.999 | 0.0490  |
|                               | Efpeglenatide 6 mg QW vs placebo      | C <sub>max</sub> (mg/dL)        | 0.699 | 0.604 | 0.808 | 0.0002  |
|                               | Efpeglenatide 16 mg QM vs placebo     | C <sub>max</sub> (mg/dL)        | 0.638 | 0.550 | 0.741 | <0.0001 |
| <b>C-peptide</b>              | Efpeglenatide 6 mg QW vs liraglutide  | AUC <sub>0-60</sub> (h*pmol/L)  | 1.113 | 0.941 | 1.316 | 0.1439  |
|                               |                                       | AUC <sub>0-120</sub> (h*pmol/L) | 1.227 | 1.046 | 1.439 | 0.0186  |
|                               |                                       | AUC <sub>0-180</sub> (h*pmol/L) | 1.226 | 1.054 | 1.425 | 0.0144  |
|                               |                                       | AUC <sub>0-360</sub> (h*pmol/L) | 1.108 | 0.960 | 1.278 | 0.1175  |
|                               |                                       | C <sub>max</sub> (pmol/L)       | 1.315 | 1.102 | 1.568 | 0.0063  |
|                               | Efpeglenatide 16 mg QM vs liraglutide | AUC <sub>0-60</sub> (h*pmol/L)  | 1.001 | 0.845 | 1.185 | 0.4970  |
|                               |                                       | AUC <sub>0-120</sub> (h*pmol/L) | 1.162 | 0.987 | 1.367 | 0.0644  |
|                               |                                       | AUC <sub>0-180</sub> (h*pmol/L) | 1.210 | 1.037 | 1.411 | 0.0222  |
|                               |                                       | AUC <sub>0-360</sub> (h*pmol/L) | 1.137 | 0.983 | 1.316 | 0.0731  |
|                               |                                       | C <sub>max</sub> (pmol/L)       | 1.312 | 1.096 | 1.572 | 0.0077  |
|                               | Efpeglenatide 6 mg QW vs placebo      | AUC <sub>0-60</sub> (h*pmol/L)  | 1.161 | 0.959 | 1.405 | 0.1951  |

|                                   |                                  |       |       |       |        |
|-----------------------------------|----------------------------------|-------|-------|-------|--------|
|                                   | AUC <sub>0-120</sub> (h*pmol/L)  | 1.208 | 1.004 | 1.454 | 0.0927 |
|                                   | AUC <sub>0-180</sub> (h* pmol/L) | 1.181 | 0.992 | 1.407 | 0.1163 |
|                                   | AUC <sub>0-360</sub> (h*pmol/L)  | 1.106 | 0.939 | 1.303 | 0.3075 |
|                                   | C <sub>max</sub> (pmol/L)        | 1.279 | 1.040 | 1.572 | 0.0520 |
| Efpeglenatide 16 mg QM vs placebo | AUC <sub>0-60</sub> (h*pmol/L)   | 1.044 | 0.863 | 1.262 | 0.7060 |
|                                   | AUC <sub>0-120</sub> (h*pmol/L)  | 1.144 | 0.951 | 1.375 | 0.2265 |
|                                   | AUC <sub>0-180</sub> (h* pmol/L) | 1.166 | 0.980 | 1.387 | 0.1453 |
|                                   | AUC <sub>0-360</sub> (h*pmol/L)  | 1.135 | 0.965 | 1.336 | 0.1974 |
|                                   | C <sub>max</sub> (pmol/L)        | 1.276 | 1.041 | 1.565 | 0.0510 |

ANOVA analysis of variance, AUC area under the curve, CI confidence interval, C<sub>max</sub> maximum concentration, LS least squares, PK pharmacokinetic, QM once monthly, QW once weekly.

<sup>†</sup>Calculated using log transformed data.

<sup>‡</sup>Ratio calculated by exponential transformation of mean difference.

<sup>§</sup>From the ANOVA model. One-sided for comparisons versus liraglutide and two-sided for comparisons versus placebo.

Non-inferiority compared to liraglutide was determined based on the lower bound of the 90% CI for the LS mean ratio using a margin of 0.8.



**Supplementary Table S2** PK parameters at trough concentration of efpeglenatide 16 mg QW\*

|                                                | Cohort/ comparison                       | LS mean <sup>†</sup> | 90% CI | 90% CI | LS mean            | 90% CI | 90% CI | P-value <sup>§</sup> |
|------------------------------------------------|------------------------------------------|----------------------|--------|--------|--------------------|--------|--------|----------------------|
|                                                |                                          |                      | Lower  | Upper  | ratio <sup>‡</sup> | Lower  | Upper  |                      |
| <b>Acetaminophen PK parameters</b>             |                                          |                      |        |        |                    |        |        |                      |
| AUC <sub>0-60</sub><br>(h*µg/mL)<br>(24/82/23) | Efpeglenatide 6 mg QW                    | 0.877                | 0.478  | 1.276  |                    |        |        |                      |
|                                                | Efpeglenatide 16 mg QM                   | 1.038                | 0.625  | 1.451  |                    |        |        |                      |
|                                                | Liraglutide                              | 0.621                | 0.223  | 1.020  |                    |        |        |                      |
|                                                | Placebo                                  | 1.574                | 1.090  | 2.058  |                    |        |        |                      |
|                                                | Efpeglenatide 6 mg QW vs<br>liraglutide  |                      |        |        | 1.292              | 0.731  | 2.283  | 0.2264               |
|                                                | Efpeglenatide 16 mg QM vs<br>liraglutide |                      |        |        | 1.517              | 0.856  | 2.688  | 0.1135               |
|                                                | Efpeglenatide 6 mg QW vs<br>placebo      |                      |        |        | 0.498              | 0.267  | 0.932  | 0.0683               |

|                                                 |                                       |       |       |       |       |       |       |        |
|-------------------------------------------------|---------------------------------------|-------|-------|-------|-------|-------|-------|--------|
|                                                 | Efpeglenatide 16 mg QM vs placebo     |       |       |       | 0.585 | 0.310 | 1.106 | 0.1642 |
|                                                 | Liraglutide vs placebo                |       |       |       | 0.386 | 0.206 | 0.723 | 0.0147 |
| AUC <sub>0-180</sub><br>(h*µg/mL)<br>(24/82/23) | Efpeglenatide 6 mg QW                 | 2.775 | 2.621 | 2.929 | –     | –     | –     | –      |
|                                                 | Efpeglenatide 16 mg QM                | 2.762 | 2.608 | 2.916 | –     | –     | –     | –      |
|                                                 | Liraglutide                           | 2.493 | 2.345 | 2.642 | –     | –     | –     | –      |
|                                                 | Placebo                               | 3.000 | 2.822 | 3.179 | –     | –     | –     | –      |
|                                                 | Efpeglenatide 6 mg QW vs liraglutide  | –     | –     | –     | 1.326 | 1.064 | 1.652 | 0.0187 |
|                                                 | Efpeglenatide 16 mg QM vs liraglutide | –     | –     | –     | 1.308 | 1.060 | 1.615 | 0.0190 |
|                                                 | Efpeglenatide 6 mg QW vs placebo      | –     | –     | –     | 0.799 | 0.631 | 1.011 | 0.1160 |
|                                                 | Efpeglenatide 16 mg QM vs placebo     | –     | –     | –     | 0.788 | 0.623 | 0.998 | 0.0966 |
|                                                 | Liraglutide vs placebo                |       |       |       | 0.602 | 0.478 | 0.760 | 0.0007 |

|                                                 |                                          |       |       |       |       |       |       |        |
|-------------------------------------------------|------------------------------------------|-------|-------|-------|-------|-------|-------|--------|
| AUC <sub>0-360</sub><br>(h*µg/mL)<br>(24/82/23) | Efpeglenatide 6 mg QW                    | 3.410 | 3.314 | 3.506 | –     | –     | –     | –      |
|                                                 | Efpeglenatide 16 mg QM                   | 3.416 | 3.319 | 3.512 | –     | –     | –     | –      |
|                                                 | Liraglutide                              | 3.273 | 3.180 | 3.365 | –     | –     | –     | –      |
|                                                 | Placebo                                  | 3.495 | 3.384 | 3.606 | –     | –     | –     | –      |
|                                                 | Efpeglenatide 6 mg QW vs<br>liraglutide  | –     | –     | –     | 1.147 | 1.001 | 1.316 | 0.0492 |
|                                                 | Efpeglenatide 16 mg QM vs<br>liraglutide | –     | –     | –     | 1.154 | 1.012 | 1.316 | 0.0369 |
|                                                 | Efpeglenatide 6 mg QW vs<br>placebo      | –     | –     | –     | 0.919 | 0.793 | 1.064 | 0.3360 |
|                                                 | Efpeglenatide 16 mg QM vs<br>placebo     | –     | –     | –     | 0.924 | 0.797 | 1.071 | 0.3716 |
|                                                 | Liraglutide vs placebo                   |       |       |       | 0.801 | 0.693 | 0.925 | 0.0134 |
| C <sub>max</sub> (µg/mL)<br>(24/82/23)          | Efpeglenatide 6 mg QW                    | 2.186 | 2.047 | 2.324 | –     | –     | –     | –      |
|                                                 | Efpeglenatide 16 mg QM                   | 2.134 | 1.996 | 2.271 | –     | –     | –     | –      |

|                                                 |                                          |       |       |       |       |       |       |        |
|-------------------------------------------------|------------------------------------------|-------|-------|-------|-------|-------|-------|--------|
|                                                 | Liraglutide                              | 1.937 | 1.804 | 2.070 | –     | –     | –     | –      |
|                                                 | Placebo                                  | 2.421 | 2.261 | 2.581 | –     | –     | –     | –      |
|                                                 | Efpeglenatide 6 mg QW vs<br>liraglutide  | –     | –     | –     | 1.283 | 1.052 | 1.563 | 0.0204 |
|                                                 | Efpeglenatide 16 mg QM vs<br>liraglutide | –     | –     | –     | 1.217 | 1.008 | 1.470 | 0.0434 |
|                                                 | Efpeglenatide 6 mg QW vs<br>placebo      | –     | –     | –     | 0.790 | 0.638 | 0.978 | 0.0707 |
|                                                 | Efpeglenatide 16 mg QM vs<br>placebo     | –     | –     | –     | 0.750 | 0.608 | 0.926 | 0.0266 |
|                                                 | Liraglutide vs placebo                   |       |       |       | 0.616 | 0.501 | 0.758 | 0.0003 |
| <b>Postprandial</b>                             |                                          |       |       |       |       |       |       |        |
| <b>Plasma glucose</b>                           |                                          |       |       |       |       |       |       |        |
| AUC <sub>0–180</sub><br>(h*mg/dL)<br>(24/82/23) | Efpeglenatide 6 mg QW                    | 6.009 | 5.922 | 6.096 | –     | –     | –     | –      |
|                                                 | Efpeglenatide 16 mg QM                   | 6.336 | 6.246 | 6.426 | –     | –     | –     | –      |

|                                                 |                                          |       |       |       |       |       |       |         |
|-------------------------------------------------|------------------------------------------|-------|-------|-------|-------|-------|-------|---------|
|                                                 | Liraglutide                              | 6.103 | 6.017 | 6.190 | –     | –     | –     | –       |
|                                                 | Placebo                                  | 6.530 | 6.422 | 6.637 | –     | –     | –     | –       |
|                                                 | Efpeglenatide 6 mg QW vs<br>liraglutide  | –     | –     | –     | 0.910 | 0.805 | 1.028 | 0.1001  |
|                                                 | Efpeglenatide 16 mg QM vs<br>liraglutide | –     | –     | –     | 1.262 | 1.114 | 1.431 | 0.0016  |
|                                                 | Efpeglenatide 6 mg QW vs<br>placebo      | –     | –     | –     | 0.594 | 0.517 | 0.683 | <0.0001 |
|                                                 | Efpeglenatide 16 mg QM vs<br>placebo     | –     | –     | –     | 0.824 | 0.717 | 0.948 | 0.0249  |
| AUC <sub>0–360</sub><br>(h*mg/dL)<br>(24/82/23) | Efpeglenatide 6 mg QW                    | 6.552 | 6.469 | 6.634 | –     | –     | –     | –       |
|                                                 | Efpeglenatide 16 mg QM                   | 6.821 | 6.735 | 6.906 | –     | –     | –     | –       |
|                                                 | Liraglutide                              | 6.667 | 6.584 | 6.749 | –     | –     | –     | –       |
|                                                 | Placebo                                  | 7.012 | 6.909 | 7.115 | –     | –     | –     | –       |
|                                                 | Efpeglenatide 6 mg QW vs<br>liraglutide  | –     | –     | –     | 0.892 | 0.794 | 1.001 | 0.0519  |

|                                  |                                          |       |       |       |       |       |       |         |
|----------------------------------|------------------------------------------|-------|-------|-------|-------|-------|-------|---------|
|                                  | Efpeglenatide 16 mg QM vs<br>liraglutide | –     | –     | –     | 1.166 | 1.036 | 1.314 | 0.0177  |
|                                  | Efpeglenatide 6 mg QW vs<br>placebo      | –     | –     | –     | 0.631 | 0.552 | 0.721 | <0.0001 |
|                                  | Efpeglenatide 16 mg QM vs<br>placebo     | –     | –     | –     | 0.826 | 0.722 | 0.944 | 0.0206  |
| $C_{\max}$ (mg/dL)<br>(24/82/23) | Efpeglenatide 6 mg QW                    | 5.149 | 5.052 | 5.246 | –     | –     | –     | –       |
|                                  | Efpeglenatide 16 mg QM                   | 5.445 | 5.344 | 5.545 | –     | –     | –     | –       |
|                                  | Liraglutide                              | 5.215 | 5.119 | 5.311 | –     | –     | –     | –       |
|                                  | Placebo                                  | 5.617 | 5.499 | 5.736 | –     | –     | –     | –       |
|                                  | Efpeglenatide 6 mg QW vs<br>liraglutide  | –     | –     | –     | 0.936 | 0.817 | 1.073 | 0.2100  |
|                                  | Efpeglenatide 16 mg QM vs<br>liraglutide | –     | –     | –     | 1.258 | 1.094 | 1.446 | 0.0043  |
|                                  | Efpeglenatide 6 mg QW vs<br>placebo      | –     | –     | –     | 0.626 | 0.537 | 0.731 | <0.0001 |
|                                  | Efpeglenatide 16 mg QM vs                | –     | –     | –     | 0.842 | 0.721 | 0.982 | 0.0679  |

| placebo              |                                          |       |       |       |       |       |       |        |
|----------------------|------------------------------------------|-------|-------|-------|-------|-------|-------|--------|
| <b>Insulin</b>       |                                          |       |       |       |       |       |       |        |
| AUC <sub>0-180</sub> | Efpeglenatide 6 mg QW                    | 5.078 | 4.894 | 5.261 | –     | –     | –     | –      |
| (h*mU/L)             |                                          |       |       |       |       |       |       |        |
| (24/82/23)           |                                          |       |       |       |       |       |       |        |
|                      | Efpeglenatide 16 mg QM                   | 5.077 | 4.887 | 5.267 | –     | –     | –     | –      |
|                      | Liraglutide                              | 4.656 | 4.474 | 4.838 | –     | –     | –     | –      |
|                      | Placebo                                  | 4.886 | 4.662 | 5.111 | –     | –     | –     | –      |
|                      | Efpeglenatide 6 mg QW vs<br>liraglutide  | –     | –     | –     | 1.524 | 1.176 | 1.976 | 0.0046 |
|                      | Efpeglenatide 16 mg QM vs<br>liraglutide | –     | –     | –     | 1.524 | 1.171 | 1.983 | 0.0052 |
|                      | Efpeglenatide 6 mg QW vs<br>placebo      | –     | –     | –     | 1.211 | 0.904 | 1.622 | 0.2766 |
|                      | Efpeglenatide 16 mg QM vs<br>placebo     | –     | –     | –     | 1.210 | 0.902 | 1.624 | 0.2799 |
| AUC <sub>0-360</sub> | Efpeglenatide 6 mg QW                    | 5.392 | 5.219 | 5.565 | –     | –     | –     | –      |

|                         |                                          |       |       |       |       |       |       |        |
|-------------------------|------------------------------------------|-------|-------|-------|-------|-------|-------|--------|
| (h*mU/L)                |                                          |       |       |       |       |       |       |        |
| (24/82/23)              |                                          |       |       |       |       |       |       |        |
|                         | Efpeglenatide 16 mg QM                   | 5.472 | 5.294 | 5.650 | –     | –     | –     | –      |
|                         | Liraglutide                              | 5.136 | 4.966 | 5.307 | –     | –     | –     | –      |
|                         | Placebo                                  | 5.265 | 5.057 | 5.474 | –     | –     | –     | –      |
|                         | Efpeglenatide 6 mg QW vs<br>liraglutide  | –     | –     | –     | 1.292 | 1.012 | 1.649 | 0.0428 |
|                         | Efpeglenatide 16 mg QM vs<br>liraglutide | –     | –     | –     | 1.399 | 1.094 | 1.789 | 0.0134 |
|                         | Efpeglenatide 6 mg QW vs<br>placebo      | –     | –     | –     | 1.135 | 0.865 | 1.491 | 0.4369 |
|                         | Efpeglenatide 16 mg QM vs<br>placebo     | –     | –     | –     | 1.230 | 0.936 | 1.617 | 0.2100 |
| C <sub>max</sub> (mU/L) | Efpeglenatide 6 mg QW                    | 4.505 | 4.283 | 4.728 | –     | –     | –     | –      |
| (24/82/23)              |                                          |       |       |       |       |       |       |        |
|                         | Efpeglenatide 16 mg QM                   | 4.416 | 4.185 | 4.647 | –     | –     | –     | –      |
|                         | Liraglutide                              | 3.933 | 3.712 | 4.154 | –     | –     | –     | –      |



|                                                  |                                          |       |       |       |       |       |       |        |
|--------------------------------------------------|------------------------------------------|-------|-------|-------|-------|-------|-------|--------|
|                                                  | Placebo                                  | 4.149 | 3.876 | 4.421 | –     | –     | –     | –      |
|                                                  | Efpeglenatide 6 mg QW vs<br>liraglutide  | –     | –     | –     | 1.773 | 1.296 | 2.427 | 0.0019 |
|                                                  | Efpeglenatide 16 mg QM vs<br>liraglutide | –     | –     | –     | 1.621 | 1.178 | 2.232 | 0.0075 |
|                                                  | Efpeglenatide 6 mg QW vs<br>placebo      | –     | –     | –     | 1.429 | 1.002 | 2.036 | 0.0980 |
|                                                  | Efpeglenatide 16 mg QM vs<br>placebo     | –     | –     | –     | 1.306 | 0.914 | 1.866 | 0.2142 |
| <b>Glucagon</b>                                  |                                          |       |       |       |       |       |       |        |
| AUC <sub>0–180</sub><br>(h*pmol/L)<br>(24/82/23) | Efpeglenatide 6 mg QW                    | 3.457 | 3.291 | 3.622 | –     | –     | –     | –      |
|                                                  | Efpeglenatide 16 mg QM                   | 3.642 | 3.472 | 3.813 | –     | –     | –     | –      |
|                                                  | Liraglutide                              | 3.581 | 3.413 | 3.749 | –     | –     | –     | –      |
|                                                  | Placebo                                  | 3.867 | 3.665 | 4.070 | –     | –     | –     | –      |
|                                                  | Efpeglenatide 6 mg QW vs<br>liraglutide  | –     | –     | –     | 0.883 | 0.694 | 1.123 | 0.1941 |

|                                                  |                                          |       |       |       |       |       |       |        |
|--------------------------------------------------|------------------------------------------|-------|-------|-------|-------|-------|-------|--------|
|                                                  | Efpeglenatide 16 mg QM vs<br>liraglutide | –     | –     | –     | 1.063 | 0.837 | 1.350 | 0.3336 |
|                                                  | Efpeglenatide 6 mg QW vs<br>placebo      | –     | –     | –     | 0.663 | 0.512 | 0.859 | 0.0109 |
|                                                  | Efpeglenatide 16 mg QM vs<br>placebo     | –     | –     | –     | 0.799 | 0.612 | 1.042 | 0.1620 |
| AUC <sub>0–360</sub><br>(h*pmol/L)<br>(24/82/23) | Efpeglenatide 6 mg QW                    | 4.255 | 4.084 | 4.426 | –     | –     | –     | –      |
|                                                  | Efpeglenatide 16 mg QM                   | 4.421 | 4.246 | 4.596 | –     | –     | –     | –      |
|                                                  | Liraglutide                              | 4.377 | 4.204 | 4.550 | –     | –     | –     | –      |
|                                                  | Placebo                                  | 4.594 | 4.388 | 4.800 | –     | –     | –     | –      |
|                                                  | Efpeglenatide 6 mg QW vs<br>liraglutide  | –     | –     | –     | 0.885 | 0.690 | 1.135 | 0.2074 |
|                                                  | Efpeglenatide 16 mg QM vs<br>liraglutide | –     | –     | –     | 1.045 | 0.818 | 1.336 | 0.3818 |
|                                                  | Efpeglenatide 6 mg QW vs<br>placebo      | –     | –     | –     | 0.713 | 0.547 | 0.929 | 0.0375 |

|                                   |                                       |       |       |       |       |       |       |        |
|-----------------------------------|---------------------------------------|-------|-------|-------|-------|-------|-------|--------|
|                                   | Efpeglenatide 16 mg QM vs placebo     | –     | –     | –     | 0.841 | 0.641 | 1.103 | 0.2880 |
| $C_{\max}$ (pmol/L)<br>(24/82/23) | Efpeglenatide 6 mg QW                 | 2.859 | 2.684 | 3.034 | –     | –     | –     | –      |
|                                   | Efpeglenatide 16 mg QM                | 2.980 | 2.799 | 3.161 | –     | –     | –     | –      |
|                                   | Liraglutide                           | 2.918 | 2.741 | 3.094 | –     | –     | –     | –      |
|                                   | Placebo                               | 3.122 | 2.909 | 3.334 | –     | –     | –     | –      |
|                                   | Efpeglenatide 6 mg QW vs liraglutide  | –     | –     | –     | 0.943 | 0.734 | 1.213 | 0.3486 |
|                                   | Efpeglenatide 16 mg QM vs liraglutide | –     | –     | –     | 1.064 | 0.827 | 1.370 | 0.3398 |
|                                   | Efpeglenatide 6 mg QW vs placebo      | –     | –     | –     | 0.769 | 0.584 | 1.012 | 0.1151 |
|                                   | Efpeglenatide 16 mg QM vs placebo     | –     | –     | –     | 0.868 | 0.656 | 1.147 | 0.3973 |
| <b>Fasting plasma glucose</b>     |                                       |       |       |       |       |       |       |        |
| $C_{\max}$ (mg/dL)                | Efpeglenatide 6 mg QW                 | 4.746 | 4.652 | 4.841 | –     | –     | –     | –      |

|                                    |                                          |       |       |       |       |       |       |        |
|------------------------------------|------------------------------------------|-------|-------|-------|-------|-------|-------|--------|
| (24/82/23)                         |                                          |       |       |       |       |       |       |        |
|                                    | Efpeglenatide 16 mg QM                   | 4.856 | 4.757 | 4.954 | –     | –     | –     | –      |
|                                    | Liraglutide                              | 4.788 | 4.692 | 4.883 | –     | –     | –     | –      |
|                                    | Placebo                                  | 5.117 | 5.000 | 5.234 | –     | –     | –     | –      |
|                                    | Efpeglenatide 6 mg QW vs<br>liraglutide  | –     | –     | –     | 0.959 | 0.839 | 1.097 | 0.3031 |
|                                    | Efpeglenatide 16 mg QM vs<br>liraglutide | –     | –     | –     | 1.070 | 0.933 | 1.228 | 0.2050 |
|                                    | Efpeglenatide 6 mg QW vs<br>placebo      | –     | –     | –     | 0.690 | 0.594 | 0.802 | 0.0002 |
|                                    | Efpeglenatide 16 mg QM vs<br>placebo     | –     | –     | –     | 0.770 | 0.661 | 0.897 | 0.0065 |
| <b>C-peptide</b>                   |                                          |       |       |       |       |       |       |        |
| AUC <sub>0–180</sub><br>(h*pmol/L) | Efpeglenatide 6 mg QW                    | 8.751 | 8.640 | 8.862 | –     | –     | –     | –      |
| (24/82/23)                         |                                          |       |       |       |       |       |       |        |
|                                    | Efpeglenatide 16 mg QM                   | 8.746 | 8.631 | 8.861 | –     | –     | –     | –      |

|                                                  |                                          |       |       |       |       |       |       |        |
|--------------------------------------------------|------------------------------------------|-------|-------|-------|-------|-------|-------|--------|
|                                                  | Liraglutide                              | 8.545 | 8.434 | 8.655 | –     | –     | –     | –      |
|                                                  | Placebo                                  | 8.628 | 8.490 | 8.767 | –     | –     | –     | –      |
|                                                  | Efpeglenatide 6 mg QW vs<br>liraglutide  | –     | –     | –     | 1.229 | 1.052 | 1.437 | 0.0158 |
|                                                  | Efpeglenatide 16 mg QM vs<br>liraglutide | –     | –     | –     | 1.223 | 1.043 | 1.434 | 0.0197 |
|                                                  | Efpeglenatide 6 mg QW vs<br>placebo      | –     | –     | –     | 1.131 | 0.944 | 1.355 | 0.2581 |
|                                                  | Efpeglenatide 16 mg QM vs<br>placebo     | –     | –     | –     | 1.125 | 0.940 | 1.347 | 0.2752 |
| AUC <sub>0–360</sub><br>(h*pmol/L)<br>(24/82/23) | Efpeglenatide 6 mg QW                    | 9.253 | 9.155 | 9.352 | –     | –     | –     | –      |
|                                                  | Efpeglenatide 16 mg QM                   | 9.318 | 9.217 | 9.420 | –     | –     | –     | –      |
|                                                  | Liraglutide                              | 9.153 | 9.055 | 9.250 | –     | –     | –     | –      |
|                                                  | Placebo                                  | 9.216 | 9.095 | 9.336 | –     | –     | –     | –      |
|                                                  | Efpeglenatide 6 mg QW vs<br>liraglutide  | –     | –     | –     | 1.106 | 0.964 | 1.270 | 0.1126 |

|                                   |                                          |       |       |       |       |       |       |        |
|-----------------------------------|------------------------------------------|-------|-------|-------|-------|-------|-------|--------|
|                                   | Efpeglenatide 16 mg QM vs<br>liraglutide | –     | –     | –     | 1.180 | 1.025 | 1.359 | 0.0272 |
|                                   | Efpeglenatide 6 mg QW vs<br>placebo      | –     | –     | –     | 1.038 | 0.887 | 1.216 | 0.6890 |
|                                   | Efpeglenatide 16 mg QM vs<br>placebo     | –     | –     | –     | 1.108 | 0.947 | 1.296 | 0.2765 |
| $C_{\max}$ (pmol/L)<br>(24/82/23) | Efpeglenatide 6 mg QW                    | 7.965 | 7.837 | 8.094 | –     | –     | –     | –      |
|                                   | Efpeglenatide 16 mg QM                   | 7.938 | 7.805 | 8.071 | –     | –     | –     | –      |
|                                   | Liraglutide                              | 7.690 | 7.562 | 7.817 | –     | –     | –     | –      |
|                                   | Placebo                                  | 7.771 | 7.609 | 7.932 | –     | –     | –     | –      |
|                                   | Efpeglenatide 6 mg QW vs<br>liraglutide  | –     | –     | –     | 1.317 | 1.100 | 1.577 | 0.0069 |
|                                   | Efpeglenatide 16 mg QM vs<br>liraglutide | –     | –     | –     | 1.282 | 1.066 | 1.541 | 0.0144 |
|                                   | Efpeglenatide 6 mg QW vs<br>placebo      | –     | –     | –     | 1.215 | 0.984 | 1.500 | 0.1281 |
|                                   | Efpeglenatide 16 mg QM vs                | –     | –     | –     | 1.182 | 0.960 | 1.456 | 0.1835 |

---

placebo

---

*AUC* area under the curve, *CI* confidence interval, *LS* least squares, *PK* pharmacokinetic, *QD* once daily, *QM* once monthly, *QW* once weekly.

<sup>^</sup>Trough concentration of efpeglenatide 16 mg QM was assessed on day 82. Please note that the concentrations above for efpeglenatide 6 mg QW and liraglutide 1.8 mg QD were assessed on days 24 and 23, respectively, when they were at peak or steady-state concentrations.

<sup>†</sup>Calculated using log-transformed data.

<sup>‡</sup>Ratio calculated by exponential transformation of mean difference.

<sup>§</sup>From the ANOVA model. One-sided for comparisons versus liraglutide and two-sided for comparisons versus placebo.

Noninferiority compared to liraglutide was determined based on the lower bound of the 90% CI for the LS mean ratio using a margin of 0.8.

Significance was determined based on a two-tailed *p*-value less than 0.05.

**Supplementary Table S3** Plasma insulin concentration parameters at peak concentration of efpeglenatide

|                |                                       | <b>Comparison</b>             | <b>LS mean<br/>ratio<sup>‡</sup></b> | <b>90% CI<br/>Lower</b> | <b>90% CI<br/>Upper</b> | <b>Nominal<br/>P-value<sup>§</sup></b> |
|----------------|---------------------------------------|-------------------------------|--------------------------------------|-------------------------|-------------------------|----------------------------------------|
| <b>Insulin</b> | Efpeglenatide 6 mg QW vs liraglutide  | AUC <sub>0-60</sub> (h*mU/L)  | 1.236                                | 0.950                   | 1.606                   | 0.0910                                 |
|                |                                       | AUC <sub>0-120</sub> (h*mU/L) | 1.532                                | 1.190                   | 1.973                   | 0.0035                                 |
|                |                                       | AUC <sub>0-180</sub> (h*mU/L) | 1.516                                | 1.208                   | 1.902                   | 0.0019                                 |
|                |                                       | AUC <sub>0-360</sub> (h*mU/L) | 1.298                                | 1.037                   | 1.625                   | 0.0290                                 |
|                |                                       | C <sub>max</sub> (mU/L)       | 1.765                                | 1.331                   | 2.342                   | 0.0008                                 |
|                | Efpeglenatide 16 mg QM vs liraglutide | AUC <sub>0-60</sub> (h*mU/L)  | 1.012                                | 0.776                   | 1.319                   | 0.4697                                 |
|                |                                       | AUC <sub>0-120</sub> (h*mU/L) | 1.264                                | 0.978                   | 1.635                   | 0.0661                                 |
|                |                                       | AUC <sub>0-180</sub> (h*mU/L) | 1.330                                | 1.056                   | 1.675                   | 0.0218                                 |
|                |                                       | AUC <sub>0-360</sub> (h*mU/L) | 1.203                                | 0.960                   | 1.509                   | 0.0878                                 |
|                |                                       | C <sub>max</sub> (mU/L)       | 1.440                                | 1.080                   | 1.920                   | 0.0196                                 |
|                | Efpeglenatide 6 mg QW vs placebo      | AUC <sub>0-60</sub> (h*mU/L)  | 1.192                                | 0.889                   | 1.598                   | 0.3190                                 |
|                |                                       | AUC <sub>0-120</sub> (h*mU/L) | 1.356                                | 1.020                   | 1.803                   | 0.0797                                 |
|                |                                       | AUC <sub>0-180</sub> (h*mU/L) | 1.309                                | 1.014                   | 1.691                   | 0.0840                                 |
|                |                                       | AUC <sub>0-360</sub> (h*mU/L) | 1.223                                | 0.952                   | 1.572                   | 0.1830                                 |



|                                   |                        |       |       |       |        |
|-----------------------------------|------------------------|-------|-------|-------|--------|
|                                   | $C_{\max}$ (mU/L)      | 1.539 | 1.118 | 2.118 | 0.0285 |
| Efpeglenatide 16 mg QM vs placebo | $AUC_{0-60}$ (h*mU/L)  | 0.976 | 0.727 | 1.312 | 0.8921 |
|                                   | $AUC_{0-120}$ (h*mU/L) | 1.119 | 0.839 | 1.492 | 0.5137 |
|                                   | $AUC_{0-180}$ (h*mU/L) | 1.149 | 0.888 | 1.486 | 0.3689 |
|                                   | $AUC_{0-360}$ (h*mU/L) | 1.134 | 0.882 | 1.459 | 0.4038 |
|                                   | $C_{\max}$ (mU/L)      | 1.256 | 0.911 | 1.731 | 0.2396 |

<sup>‡</sup>Ratio calculated by exponential transformation of mean difference.

<sup>§</sup>From the ANOVA model. One-sided for comparisons versus liraglutide and two-sided for comparisons versus placebo.

Plasma insulin concentrations (Figure 2E) were not significantly different between placebo and efpeglenatide 6 mg QW or 16 mg QM, with the exception of  $C_{\max}$  for efpeglenatide 6 mg versus placebo ( $p=0.0285$ ).  $AUC_{0-180}$ ,  $AUC_{0-360}$ , and  $C_{\max}$  were significantly greater with both efpeglenatide groups versus liraglutide ( $p<0.05$  for all).

**Supplementary Table S4** Number (%) of patients with adverse events related to study drug, according to severity (n>1 in any group) (safety population)

|                                                                    | Cohort A              |          |          |          |          |          | Cohort B               |          |          |          |          |          | Cohort C    |          |          |
|--------------------------------------------------------------------|-----------------------|----------|----------|----------|----------|----------|------------------------|----------|----------|----------|----------|----------|-------------|----------|----------|
|                                                                    | Efpeglenatide 6 mg QW |          |          | Placebo  |          |          | Efpeglenatide 16 mg QM |          |          | Placebo  |          |          | Liraglutide |          |          |
|                                                                    | Mild                  | Moderate | Total    | Mild     | Moderate | Total    | Mild                   | Moderate | Total    | Mild     | Moderate | Total    | Mild        | Moderate | Total    |
| <b>Gastrointestinal disorders, n (%)</b>                           |                       |          |          |          |          |          |                        |          |          |          |          |          |             |          |          |
| Diarrhoea                                                          | 5 (38.5)              | –        | 5 (38.5) | 1 (25.0) | –        | 1 (25.0) | 7 (53.8)               | –        | 7 (53.8) | –        | –        | –        | 2 (15.4)    | –        | 2 (15.4) |
| Nausea                                                             | 5 (38.5)              | –        | 5 (38.5) | –        | –        | –        | 7 (53.8)               | 1 (7.7)  | 8 (61.5) | 1 (25.0) | –        | 1 (25.0) | 4 (30.8)    | –        | 4 (30.8) |
| Vomiting                                                           | 3 (23.1)              | –        | 3 (23.1) | –        | –        | –        | 4 (30.8)               | 2 (15.4) | 6 (46.2) | –        | –        | –        | 1 (7.7)     | 1 (7.7)  | 2 (15.4) |
| Flatulence                                                         | 1 (7.7)               | –        | 1 (7.7)  | –        | –        | –        | 4 (30.8)               | –        | 4 (30.8) | –        | –        | –        | –           | –        | –        |
| Abdominal distension                                               | 1 (7.7)               | –        | 1 (7.7)  | –        | –        | –        | 3 (23.1)               | –        | 3 (23.1) | –        | –        | –        | 2 (15.4)    | –        | 2 (15.4) |
| Abdominal pain                                                     | –                     | –        | –        | –        | –        | –        | 2 (15.4)               | –        | 2 (15.4) | –        | –        | –        | –           | –        | –        |
| Eructation                                                         | –                     | –        | –        | –        | –        | –        | 1 (7.7)                | –        | 1 (7.7)  | –        | –        | –        | 2 (15.4)    | –        | 2 (15.4) |
| <b>General disorders and administration site conditions, n (%)</b> |                       |          |          |          |          |          |                        |          |          |          |          |          |             |          |          |
| Injection-site pain                                                | 2 (15.4)              | –        | 2 (15.4) | –        | –        | –        | 1 (7.7)                | –        | 1 (7.7)  | 1 (25.0) | –        | 1 (25.0) | –           | –        | –        |
| Early satiety                                                      | 1 (7.7)               | –        | 1 (7.7)  | –        | –        | –        | 3 (23.1)               | –        | 3 (23.1) | –        | –        | –        | –           | –        | –        |
| <b>Metabolism and nutrition disorders, n (%)</b>                   |                       |          |          |          |          |          |                        |          |          |          |          |          |             |          |          |
| Decreased appetite                                                 | 4 (30.8)              | –        | 4 (30.8) | –        | –        | –        | 4 (30.8)               | –        | 4 (30.8) | –        | –        | –        | 2 (15.4)    | –        | 2 (15.4) |
| Hypoglycaemia                                                      | 7 (53.8)              | –        | 7 (53.8) | –        | –        | –        | 4 (30.8)               | 1 (7.7)  | 5 (38.5) | –        | –        | –        | 1 (7.7)     | –        | 1 (7.7)  |

QM once monthly, QW once weekly.
